# Supplementary material for: Developmental disruption of amygdala transcriptome and socioemotional behavior in rats exposed to valproic acid prenatally
Source: PubMed Central journal article supplement (PMC5539636; doi:10.1186/s13229-017-0160-x), 2017-08-01

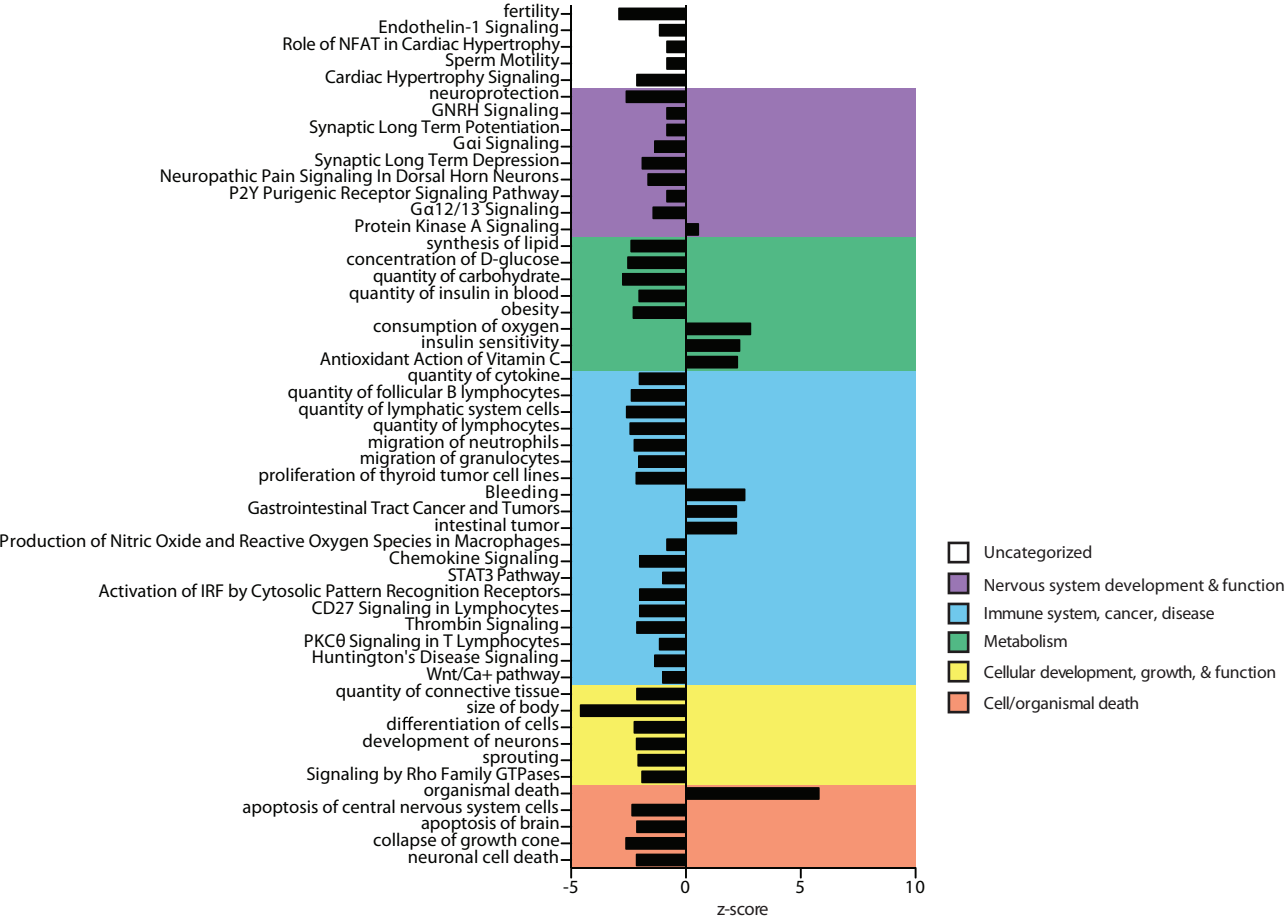

Supplement: 13229_2017_160_MOESM2_ESM.pdf [file 13229_2017_160_MOESM2_ESM.pdf]
